# Supplementary material for: Ni–Co sulfide nanoboxes with tunable compositions for high-performance electrochemical pseudocapacitors
Source: Royal Society of Chemistry journal article supplement (doi:10.1039/c6ta04090j), 2016-01-01
Supplement: c6ta04090j1.pdf [file c6ta04090j1.pdf]

Supplementary Information

**Ni-Co Sulfide Nanoboxes with Tunable Compositions for High-performance Electrochemical Pseudocapacitors**

Yangyang Xu,<sup>‡a</sup> Xuehui Gao,<sup>‡b</sup> Wenya Chu,<sup>a</sup> Quanguo Li,<sup>a</sup> Tianjun Li,<sup>c</sup> Chengdu Liang<sup>a</sup> and Zhan Lin<sup>\*a</sup>

*<sup>a</sup>Key Laboratory of Biomass Chemical Engineering of Ministry of Education, College of Chemical and Biological Engineering, Zhejiang University, Hangzhou 310027, China*

*\*Email: zhanlin@zju.edu.cn*

*<sup>b</sup> State key laboratory of Silicon Materials, School of Materials Science and Engineering, Zhejiang University, Hangzhou 310027, China*

*<sup>c</sup>College of Mathematics, Physics and Information, Shaoxing University, Shaoxing, Zhejiang 312000, China*

**Table S1.** Electrochemical performance of hollow NiCo<sub>2</sub>S<sub>4</sub> nanobox electrode compared with reported NiCo<sub>2</sub>S<sub>4</sub> electrodes.

| Electrode structure                                                                | Specific capacitance                               | Capacitance degradation                              | Capacitance retention                    | Reference       |
|------------------------------------------------------------------------------------|----------------------------------------------------|------------------------------------------------------|------------------------------------------|-----------------|
| <b>Hollow NiCo<sub>2</sub>S<sub>4</sub> nanoboxes</b>                              | <b>1588 F g<sup>-1</sup> at 2 A g<sup>-1</sup></b> | <b>11.8% after 4000 cycles at 5 A g<sup>-1</sup></b> | <b>64% from 1 to 20 A g<sup>-1</sup></b> | <b>Our work</b> |
| NiCo <sub>2</sub> S <sub>4</sub> nanotube arrays                                   | 1430 F g <sup>-1</sup> at 2 A g <sup>-1</sup>      | 4% after 2000 cycles at 5 A g <sup>-1</sup>          | 84% from 2 to 10 A g <sup>-1</sup>       | 1               |
| NiCo <sub>2</sub> S <sub>4</sub> hollow nanoprism                                  | 895.2 F g <sup>-1</sup> at 1 A g <sup>-1</sup>     | 14.3% after 1500 cycles at 5 A g <sup>-1</sup>       | 65.3% from 1 to 20 A g <sup>-1</sup>     | 2               |
| NiCo <sub>2</sub> S <sub>4</sub> ball-in-ball hollow spheres                       | 1036 F g <sup>-1</sup> at 1 A g <sup>-1</sup>      | 13% after 2000 cycles at 5 A g <sup>-1</sup>         | 68.1% from 1 to 20 A g <sup>-1</sup>     | 3               |
| NiCo <sub>2</sub> S <sub>4</sub> -RGO                                              | 1161 F g <sup>-1</sup> at 5 A g <sup>-1</sup>      | 4.5% after 2000 cycles at 5 A g <sup>-1</sup>        | 52.4% from 1 to 20 A g <sup>-1</sup>     | 4               |
| NiCo <sub>2</sub> S <sub>4</sub> NS/NCF                                            | 1138 F g <sup>-1</sup> at 5 A g <sup>-1</sup>      | 9.6% after 2000 cycles at 10 A g <sup>-1</sup>       | 71.2% from 2 to 20 A g <sup>-1</sup>     | 5               |
| NiCo <sub>2</sub> S <sub>4</sub> nanosheets                                        | 1084 F g <sup>-1</sup> at 1 A g <sup>-1</sup>      | 8% after 1500 cycles at 2 A g <sup>-1</sup>          | 40.3% from 1 to 8 A g <sup>-1</sup>      | 6               |
| NiCo <sub>2</sub> S <sub>4</sub> @MnO <sub>2</sub>                                 | 1337.8 F g <sup>-1</sup> at 2 A g <sup>-1</sup>    | 18% after 2000 cycles at 5 A g <sup>-1</sup>         | 44.9% from 2 to 20 A g <sup>-1</sup>     | 7               |
| NiCo <sub>2</sub> S <sub>4</sub> nanotubes                                         | 1181.8 F g <sup>-1</sup> at 2 A g <sup>-1</sup>    | 80.1% after 5000 cycles at 4 A g <sup>-1</sup>       | 58.6% from 1 to 10 A g <sup>-1</sup>     | 8               |
| CoS@NiCo <sub>2</sub> S <sub>4</sub> NWSAs                                         | 7.62 F cm <sup>-2</sup> at 5 mA cm <sup>-2</sup>   | 28% after 3000 cycles at 5 mA cm <sup>-2</sup>       | 72.4% from 5 to 30 mA cm <sup>-2</sup>   | 9               |
| NiCo <sub>2</sub> S <sub>4</sub> /Ni <sub>x</sub> Co <sub>9-x</sub> S <sub>8</sub> | 680 F g <sup>-1</sup> at 5 A g <sup>-1</sup>       | 24.6% after 2000 cycles at 10 A g <sup>-1</sup>      | 69.8% from 4 to 9 A g <sup>-1</sup>      | 10              |

**Table S2.** Electrochemical performance of hollow Ni<sub>2</sub>CoS<sub>4</sub> nanobox electrode compared with reported Ni<sub>2</sub>CoS<sub>4</sub> electrodes.

| Electrode structure                                   | Specific capacitance                               | Capacitance degradation                             | Capacitance retention                      | Reference       |
|-------------------------------------------------------|----------------------------------------------------|-----------------------------------------------------|--------------------------------------------|-----------------|
| <b>Ni<sub>2</sub>CoS<sub>4</sub> nanoboxes</b>        | <b>1200 F g<sup>-1</sup> at 2 A g<sup>-1</sup></b> | <b>9.5% after 4000 cycles at 5 A g<sup>-1</sup></b> | <b>81.2% from 1 to 20 A g<sup>-1</sup></b> | <b>Our work</b> |
| Ni <sub>2</sub> CoS <sub>4</sub> nanosheet arrays     | 26.39 F cm <sup>-2</sup> at 5 mA cm <sup>-2</sup>  | 22.1% after 3000 cycles at 30 mA cm <sup>-2</sup>   | 78% from 5 to 50 mA cm <sup>-2</sup>       | 11              |
| Ni <sub>2</sub> CoS <sub>4</sub> nanoparticles        | 916.7 F g <sup>-1</sup> at 5 A g <sup>-1</sup>     | 51.5% after 2000 cycles at 4 A g <sup>-1</sup>      | 36.1% from 1 to 20 A g <sup>-1</sup>       | 12              |
| Mushroom-like Ni <sub>2</sub> CoS <sub>4</sub> arrays | 5.71 F cm <sup>-2</sup> at 20 mA cm <sup>-2</sup>  | 19.1% after 3000 cycles at 20 mA cm <sup>-2</sup>   | 82% from 5 to 50 mA cm <sup>-2</sup>       | 13              |
| Ni <sub>2</sub> CoS <sub>4</sub> nanowires            | 990 F g <sup>-1</sup> at 10 A g <sup>-1</sup>      | 28% after 5000 cycles at 2.5 A g <sup>-1</sup>      | 72% from 2.5 to 25 A g <sup>-1</sup>       | 14              |
| Ni <sub>2</sub> CoS <sub>4</sub> nanoparticles        | 617.8 F g <sup>-1</sup> at 50 A g <sup>-1</sup>    | 11% after 1000 cycles at 10 A g <sup>-1</sup>       | 82% from 1 to 5 A g <sup>-1</sup>          | 15              |

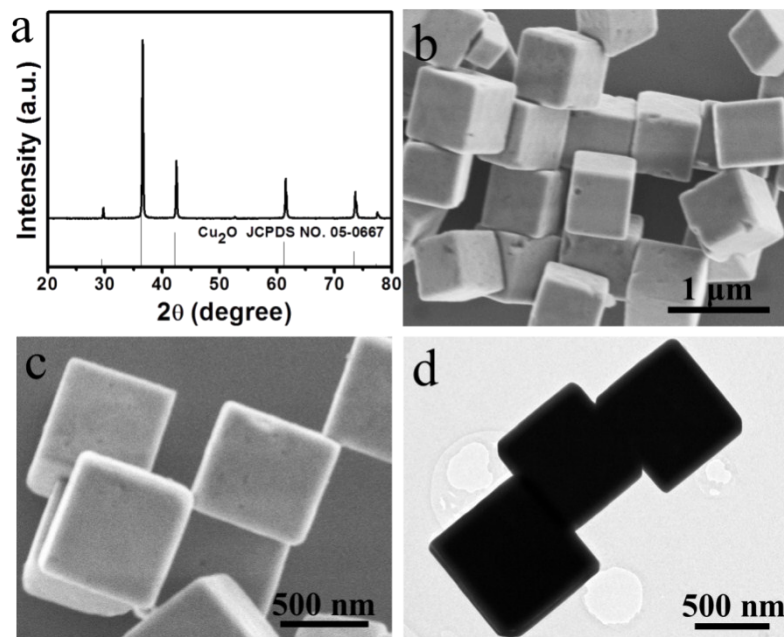

**Fig. S1.** (a) XRD pattern, (b and c) FESEM, and (d) TEM images of Cu<sub>2</sub>O nanocubes.

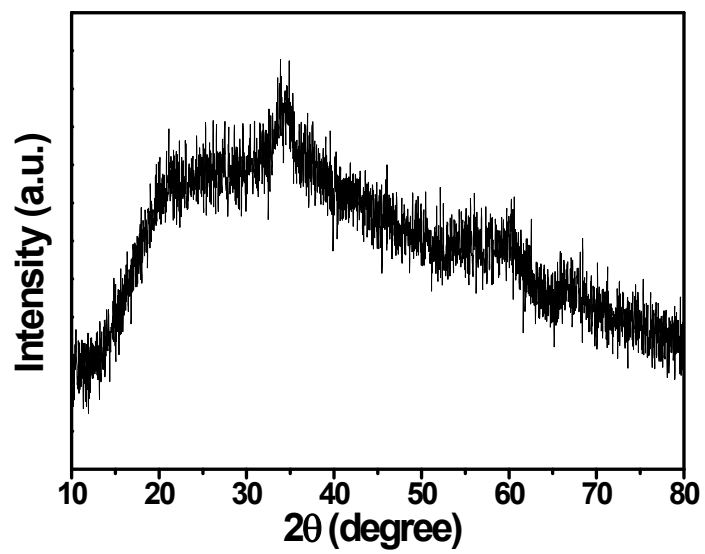

**Fig. S2.** XRD pattern of Ni-Co precursor.

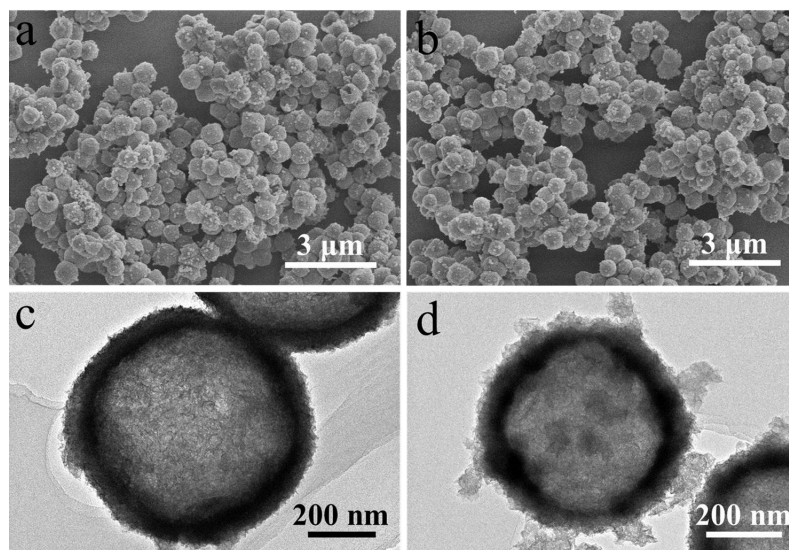

**Fig. S3.** (a and c) FESEM and TEM images of hollow Ni-Co<sub>2</sub> precursor. (b and d) FESEM and TEM images of hollow Ni<sub>2</sub>-Co precursor.

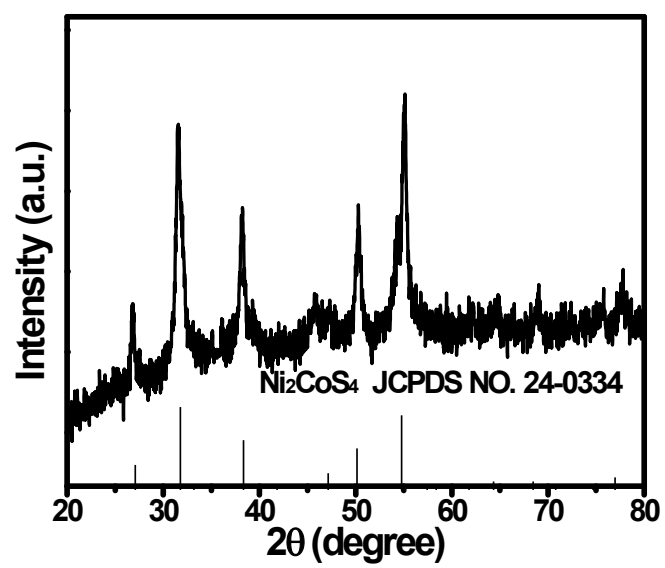

**Fig. S4.** XRD pattern of  $\text{Ni}_2\text{CoS}_4$ .

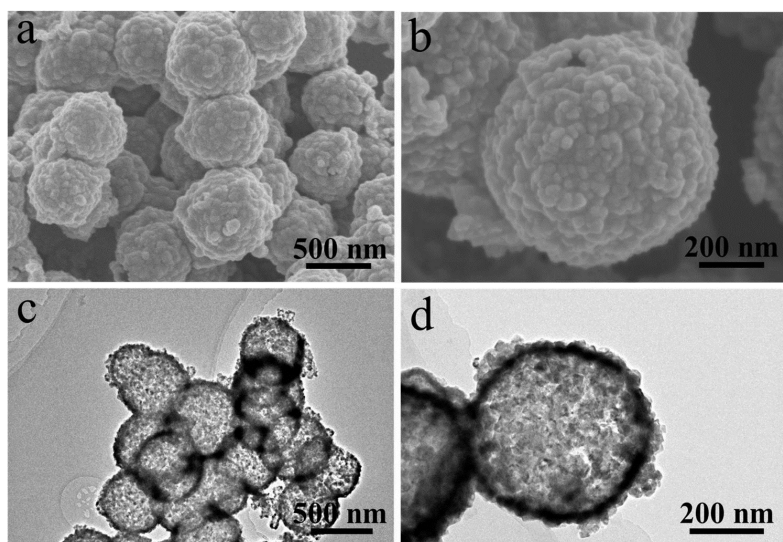

**Fig. S5.** (a and b) FESEM and (c and d) TEM images of  $\text{Ni}_2\text{CoS}_4$  nanoboxes.



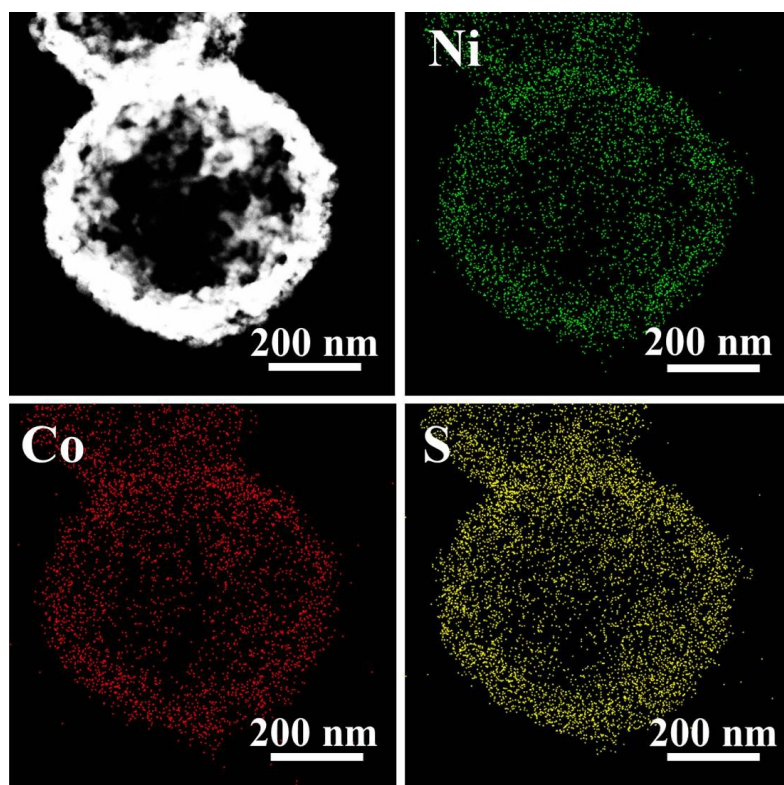

**Fig. S6.** EDX mapping results of  $\text{NiCo}_2\text{S}_4$ .

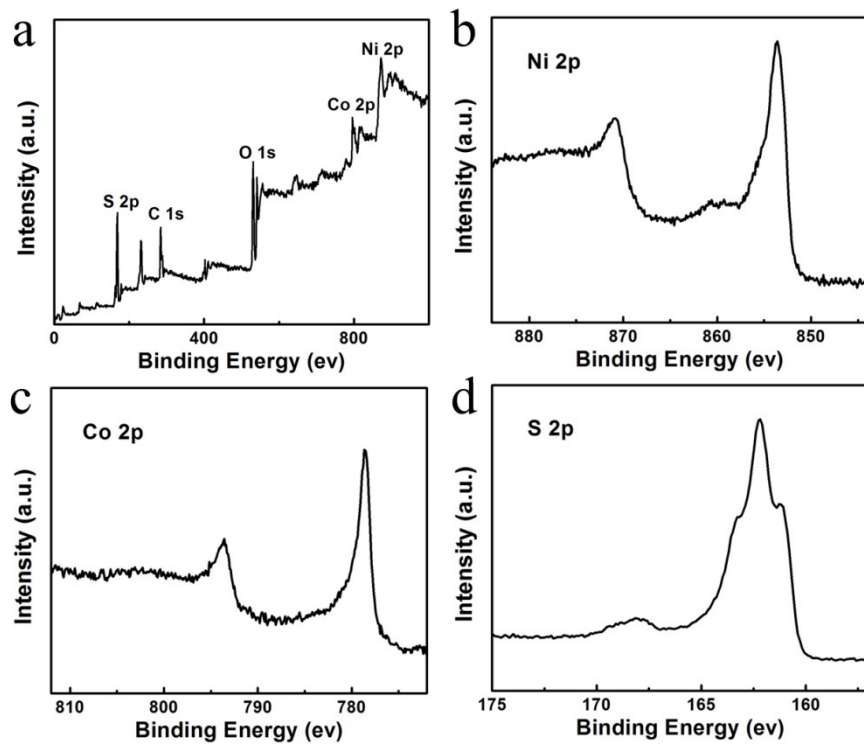

**Fig. S7.** (a) XPS survey of NiCo<sub>2</sub>S<sub>4</sub> and high-resolution XPS of (b) Ni 2p, (c) Co 2p, and (d) S 2p.

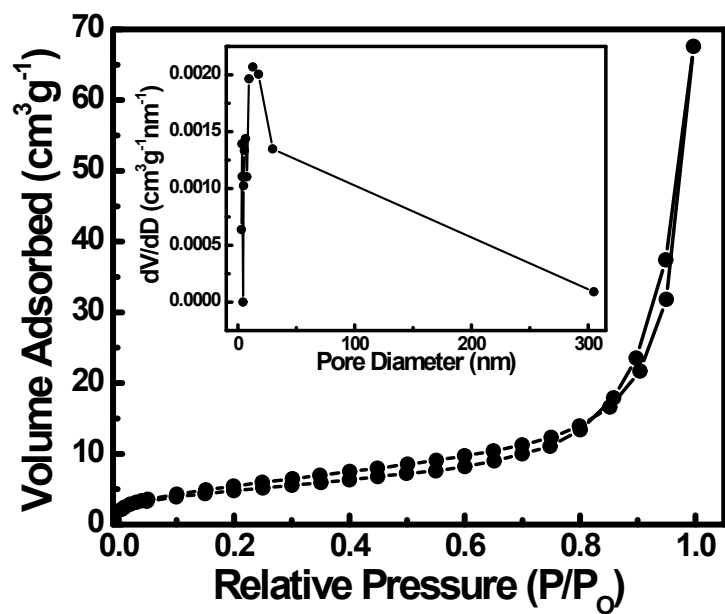

**Fig. S8.** N<sub>2</sub> adsorption-desorption isotherm and pore-size distribution curves of NiCo<sub>2</sub>S<sub>4</sub>.

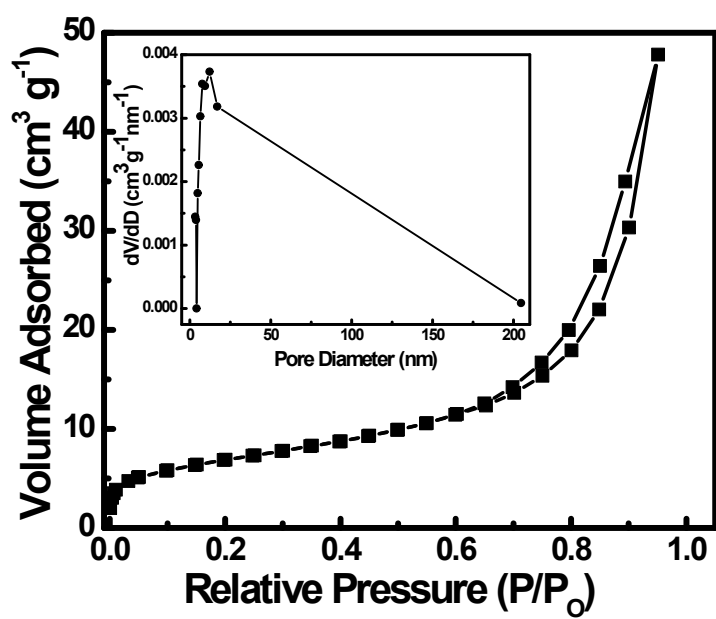

**Fig. S9.** N<sub>2</sub> adsorption-desorption isotherm and pore-size distribution curves of Ni<sub>2</sub>CoS<sub>4</sub> nanoboxes.

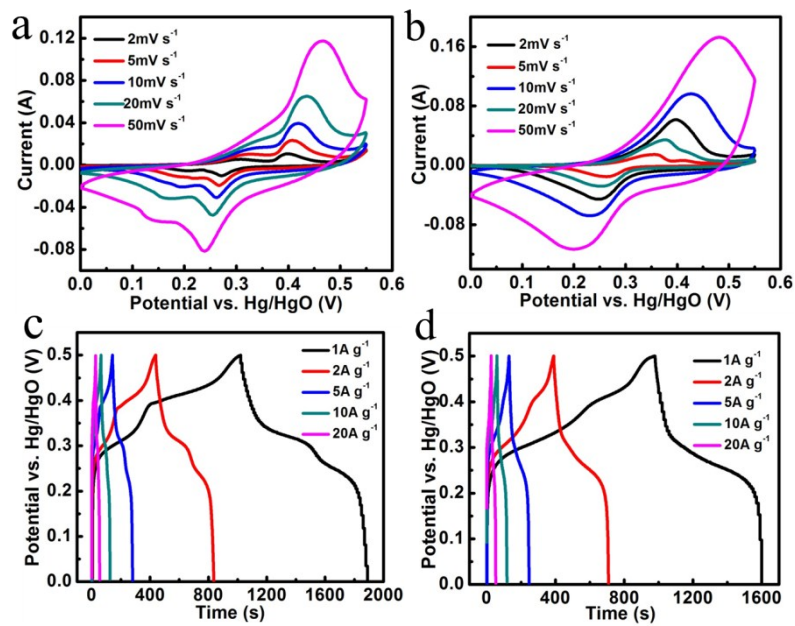

**Fig. S10.** (a and b) CV curves at various scan rates ranging from 2 to 50 mV s<sup>-1</sup> of the NiCo<sub>2</sub>S<sub>4</sub> and Ni<sub>2</sub>CoS<sub>4</sub> electrodes. (c and d) Charge-discharge voltage profiles at different current densities of the NiCo<sub>2</sub>S<sub>4</sub> and Ni<sub>2</sub>CoS<sub>4</sub> electrodes.

## References for supporting information:

- 1 J. W. Xiao, L. Wan, S. H. Yang, F. Xiao and S. Wang, *Nano Lett.*, 2014, **14**, 831-838.
- 2 L. Yu, L. Zhang, H. B. Wu and X. W. Lou, *Angew. Chem. Int. Ed.*, 2014, **53**, 3711-3714.
- 3 L. Shen, L. Yu, H. B. Wu, X.-Y. Yu, X. Zhang and X. W. Lou, *Nat. Commun.*, 2015, **6**.
- 4 S. J. Peng, L. L. Li, C. C. Li, H. T. Tan, R. Cai, H. Yu, S. Mhaisalkar, M. Srinivasan, S. Ramakrishna and Q. Y. Yan, *Chem. Commun.*, 2013, **49**, 10178-10180.
- 5 L. F. Shen, J. Wang, G. Y. Xu, H. S. Li, H. Dou and X. G. Zhang, *Adv. Energy mater.*, 2015, **5**.
- 6 T. Peng, Z. Qian, J. Wang, D. Song, J. Liu, Q. Liu and P. Wang, *J. Mater. Chem. A*, 2014, **2**, 19376-19382.
- 7 J. Yang, M. Z. Ma, C. C. Sun, Y. F. Zhang, W. Huang and X. C. Dong, *J. Mater. Chem. A*, 2015, **3**, 1258-1264.
- 8 B. Yang, L. Yu, H. J. Yan, Y. B. Sun, Q. Liu, J. Y. Liu, D. L. Song, S. X. Hu, Y. Yuan, L. H. Liu and J. Wang, *J. Mater. Chem. A*, 2015, **3**, 13308-13316.
- 9 W. Zeng, G. H. Zhang, X. Wu, K. Zhang, H. Zhang, S. C. Hou, C. C. Li, T. H. Wang and H. G. Duan, *J. Mater. Chem. A*, 2015, **3**, 24033-24040.
- 10 Y. F. Zhang, C. C. Sun, H. Q. Su, W. Huang and X. C. Dong, *Nanoscale*, 2015, **7**, 3155-3163.
- 11 W. Hu, R. Q. Chen, W. Xie, L. L. Zou, N. Qin and D. H. Bao, *ACS Appl. Mater. Interfaces*, 2014, **6**, 19318-19326.
- 12 W. M. Du, Z. Q. Zhu, Y. B. Wang, J. N. Liu, W. J. Yang, X. F. Qian and H. Pang, *RSC Adv.*, 2014, **4**, 6998-7002.
- 13 L. Mei, T. Yang, C. Xu, M. Zhang, L. Chen, Q. Li and T. Wang, *Nano Energy*, 2014, **3**, 36-45.
- 14 Q. Q. Hu, W. Q. Ma, G. Liang, H. H. Nan, X. T. Zheng and X. J. Zhang, *RSC Adv.*, 2015, **5**, 84974-84979.
- 15 W. M. Du, Z. Q. Zhu, Y. L. Xu, Z. H. Zhang, X. Xiong, P. B. Geng and H. Pang, *J. Solid State Electr.*, 2015, **19**, 2177-2188.
